# Supplementary material for: Plasma cell-free DNA 5-hydroxymethylcytosine and whole-genome sequencing signatures for early detection of esophageal cancer
Source: PubMed Central journal article supplement (PMC10730877; doi:10.1038/s41419-023-06329-3), 2023-12-19
Supplement: 41419_2023_6329_MOESM1_ESM.pdf [file 41419_2023_6329_MOESM1_ESM.pdf]

**Table S1A. Summary of demographic and clinicopathological characteristics of 100 esophageal cancer patients and 71 healthy controls in this study.**

| Characteristics                        |        | Healthy controls<br>(n=71) | Early ESCC<br>patients (n=50) | Mid-Ad ESCC<br>patients (n=50) |
|----------------------------------------|--------|----------------------------|-------------------------------|--------------------------------|
| <b>Demographic</b>                     |        |                            |                               |                                |
| <b>Age at surgery,<br/>years, Mean</b> |        | 58 (52-63)                 | 61 (55-67)                    | 59 (55-64)                     |
| <b>Gender, n (%)</b>                   | Male   | 55 (77)                    | 38 (76)                       | 37 (74)                        |
|                                        | Female | 16 (23)                    | 12 (24)                       | 13 (26)                        |
| <b>Clinical</b>                        |        |                            |                               |                                |
| <b>TNM stage, n (%)</b>                | 0      | -                          | 27 (27)                       | -                              |
|                                        | IA     | -                          | 3 (3)                         | -                              |
|                                        | IB     | -                          | 20 (20)                       | -                              |
|                                        | IIA    | -                          | -                             | 19 (19)                        |
|                                        | IIB    | -                          | -                             | 7 (7)                          |
|                                        | IIIA   | -                          | -                             | 1 (1)                          |
|                                        | IIIB   | -                          | -                             | 19 (19)                        |
|                                        | IV     | -                          | -                             | 4 (4)                          |

Note: Mid-Ad, middle to advanced; ESCC, esophageal squamous cell carcinoma.

**Table S1B. Clinicopathological characteristics of 100 esophageal cancer patients and 71 healthy controls.**

| Sample ID | Population | Gender | Age | Caner Subtype      | TNM Stage | Subgroup |
|-----------|------------|--------|-----|--------------------|-----------|----------|
| C1802961  | Chinese    | Male   | 57  | Squamous carcinoma | P0        | Early    |
| C1802962  | Chinese    | Male   | 59  | Squamous carcinoma | P0        | Early    |
| C1802973  | Chinese    | Male   | 69  | Squamous carcinoma | P0        | Early    |
| C1802975  | Chinese    | Male   | 70  | Squamous carcinoma | P0        | Early    |
| C1802996  | Chinese    | Male   | 66  | Squamous carcinoma | P0        | Early    |
| C1802998  | Chinese    | Male   | 48  | Squamous carcinoma | P0        | Early    |
| C1803017  | Chinese    | Male   | 55  | Squamous carcinoma | P0        | Early    |
| C1803018  | Chinese    | Male   | 60  | Squamous carcinoma | P0        | Early    |
| C1803019  | Chinese    | Male   | 66  | Squamous carcinoma | P0        | Early    |
| C1803020  | Chinese    | Male   | 52  | Squamous carcinoma | P0        | Early    |
| C1803023  | Chinese    | Male   | 67  | Squamous carcinoma | P0        | Early    |
| C1803026  | Chinese    | Male   | 55  | Squamous carcinoma | P0        | Early    |
| C1803050  | Chinese    | Male   | 59  | Squamous carcinoma | P0        | Early    |
| C1906074  | Chinese    | Male   | 63  | Squamous carcinoma | P0        | Early    |
| C1906075  | Chinese    | Male   | 68  | Squamous carcinoma | P0        | Early    |
| C1803070  | Chinese    | Female | 54  | Squamous carcinoma | P0        | Early    |
| C1803071  | Chinese    | Male   | 68  | Squamous carcinoma | P0        | Early    |
| C1803072  | Chinese    | Male   | 53  | Squamous carcinoma | P0        | Early    |
| C1803075  | Chinese    | Male   | 63  | Squamous carcinoma | P0        | Early    |
| C1803078  | Chinese    | Male   | 65  | Squamous carcinoma | P0        | Early    |
| C1906095  | Chinese    | Female | 70  | Squamous carcinoma | P0        | Early    |
| C1906096  | Chinese    | Female | 53  | Squamous carcinoma | P0        | Early    |
| C2005345  | Chinese    | Female | 70  | Squamous carcinoma | P0        | Early    |
| C2005346  | Chinese    | Male   | 65  | Squamous carcinoma | P0        | Early    |
| C2005347  | Chinese    | Female | 60  | Squamous carcinoma | P0        | Early    |
| C2005348  | Chinese    | Male   | 61  | Squamous carcinoma | P0        | Early    |
| C2005349  | Chinese    | Male   | 68  | Squamous carcinoma | P0        | Early    |
| C1802967  | Chinese    | Male   | 67  | Squamous carcinoma | I A       | Early    |
| C1802969  | Chinese    | Male   | 68  | Squamous carcinoma | I A       | Early    |
| C1803024  | Chinese    | Male   | 68  | Squamous carcinoma | I A       | Early    |
| C1802283  | Chinese    | Female | 53  | Squamous carcinoma | I B       | Early    |
| C1802970  | Chinese    | Male   | 57  | Squamous carcinoma | I B       | Early    |
| C1802971  | Chinese    | Male   | 50  | Squamous carcinoma | I B       | Early    |
| C1802972  | Chinese    | Male   | 50  | Squamous carcinoma | I B       | Early    |
| C1802977  | Chinese    | Male   | 50  | Squamous carcinoma | I B       | Early    |
| C1802980  | Chinese    | Male   | 62  | Squamous carcinoma | I B       | Early    |
| C1802981  | Chinese    | Male   | 65  | Squamous carcinoma | I B       | Early    |

|           |         |        |    |                    |      |        |
|-----------|---------|--------|----|--------------------|------|--------|
| C1802985  | Chinese | Male   | 48 | Squamous carcinoma | I B  | Early  |
| C1802990  | Chinese | Male   | 50 | Squamous carcinoma | I B  | Early  |
| C1802997  | Chinese | Female | 66 | Squamous carcinoma | I B  | Early  |
| C1803003  | Chinese | Male   | 64 | Squamous carcinoma | I B  | Early  |
| C1803007  | Chinese | Female | 61 | Squamous carcinoma | I B  | Early  |
| C1803009  | Chinese | Female | 64 | Squamous carcinoma | I B  | Early  |
| C1803051  | Chinese | Female | 56 | Squamous carcinoma | I B  | Early  |
| C1803052  | Chinese | Male   | 56 | Squamous carcinoma | I B  | Early  |
| C1803061  | Chinese | Male   | 70 | Squamous carcinoma | I B  | Early  |
| C1803069  | Chinese | Female | 58 | Squamous carcinoma | I B  | Early  |
| C1803062  | Chinese | Male   | 58 | Squamous carcinoma | I B  | Early  |
| C1803085  | Chinese | Female | 67 | Squamous carcinoma | I B  | Early  |
| C2005319  | Chinese | Male   | 57 | Squamous carcinoma | I B  | Early  |
| Z18W01296 | Chinese | Male   | 50 | Squamous carcinoma | II A | Mid-Ad |
| C1802960  | Chinese | Male   | 55 | Squamous carcinoma | II A | Mid-Ad |
| C1802978  | Chinese | Male   | 69 | Squamous carcinoma | II A | Mid-Ad |
| C1802979  | Chinese | Male   | 51 | Squamous carcinoma | II A | Mid-Ad |
| C1802983  | Chinese | Male   | 66 | Squamous carcinoma | II A | Mid-Ad |
| C1802988  | Chinese | Male   | 54 | Squamous carcinoma | II A | Mid-Ad |
| C1802991  | Chinese | Male   | 56 | Squamous carcinoma | II A | Mid-Ad |
| C1802995  | Chinese | Male   | 57 | Squamous carcinoma | II A | Mid-Ad |
| C1803000  | Chinese | Male   | 56 | Squamous carcinoma | II A | Mid-Ad |
| C1803002  | Chinese | Male   | 56 | Squamous carcinoma | II A | Mid-Ad |
| C1803004  | Chinese | Male   | 64 | Squamous carcinoma | II A | Mid-Ad |
| C1803005  | Chinese | Female | 64 | Squamous carcinoma | II A | Mid-Ad |
| C1903184  | Chinese | Male   | 64 | Squamous carcinoma | II A | Mid-Ad |
| C1803016  | Chinese | Male   | 54 | Squamous carcinoma | II A | Mid-Ad |
| C1803022  | Chinese | Male   | 68 | Squamous carcinoma | II A | Mid-Ad |
| C1803025  | Chinese | Female | 60 | Squamous carcinoma | II A | Mid-Ad |
| C1803049  | Chinese | Female | 68 | Squamous carcinoma | II A | Mid-Ad |
| C1803077  | Chinese | Female | 69 | Squamous carcinoma | II A | Mid-Ad |
| C1906087  | Chinese | Female | 58 | Squamous carcinoma | II A | Mid-Ad |
| C1802963  | Chinese | Male   | 55 | Squamous carcinoma | II B | Mid-Ad |
| C1802964  | Chinese | Male   | 57 | Squamous carcinoma | II B | Mid-Ad |
| C1802965  | Chinese | Male   | 56 | Squamous carcinoma | II B | Mid-Ad |
| C1802982  | Chinese | Female | 56 | Squamous carcinoma | II B | Mid-Ad |
| C1802984  | Chinese | Male   | 53 | Squamous carcinoma | II B | Mid-Ad |
| C1803011  | Chinese | Male   | 67 | Squamous carcinoma | II B | Mid-Ad |
| C2005343  | Chinese | Female | 66 | Squamous carcinoma | II B | Mid-Ad |
| C1803047  | Chinese | Female | 56 | Squamous carcinoma | IIIA | Mid-Ad |
| Z18W01385 | Chinese | Male   | 52 | Squamous carcinoma | IIIB | Mid-Ad |
| C1803080  | Chinese | Male   | 52 | Squamous carcinoma | IIIB | Mid-Ad |

|           |         |        |    |                    |      |        |
|-----------|---------|--------|----|--------------------|------|--------|
| Z18W01384 | Chinese | Male   | 60 | Squamous carcinoma | IIIB | Mid-Ad |
| C1802966  | Chinese | Male   | 53 | Squamous carcinoma | IIIB | Mid-Ad |
| C1802968  | Chinese | Male   | 60 | Squamous carcinoma | IIIB | Mid-Ad |
| C1802974  | Chinese | Male   | 56 | Squamous carcinoma | IIIB | Mid-Ad |
| C1802976  | Chinese | Male   | 56 | Squamous carcinoma | IIIB | Mid-Ad |
| C1802987  | Chinese | Male   | 67 | Squamous carcinoma | IIIB | Mid-Ad |
| C1802989  | Chinese | Male   | 50 | Squamous carcinoma | IIIB | Mid-Ad |
| C1802992  | Chinese | Male   | 54 | Squamous carcinoma | IIIB | Mid-Ad |
| C1802993  | Chinese | Female | 60 | Squamous carcinoma | IIIB | Mid-Ad |
| C1802994  | Chinese | Male   | 57 | Squamous carcinoma | IIIB | Mid-Ad |
| C1802999  | Chinese | Male   | 66 | Squamous carcinoma | IIIB | Mid-Ad |
| C1803010  | Chinese | Male   | 53 | Squamous carcinoma | IIIB | Mid-Ad |
| C1803012  | Chinese | Male   | 68 | Squamous carcinoma | IIIB | Mid-Ad |
| C1803021  | Chinese | Female | 64 | Squamous carcinoma | IIIB | Mid-Ad |
| C1803048  | Chinese | Male   | 57 | Squamous carcinoma | IIIB | Mid-Ad |
| C1803079  | Chinese | Female | 50 | Squamous carcinoma | IIIB | Mid-Ad |
| C1906086  | Chinese | Female | 59 | Squamous carcinoma | IIIB | Mid-Ad |
| Z18W01297 | Chinese | Male   | 59 | Squamous carcinoma | IVA  | Mid-Ad |
| C1803006  | Chinese | Male   | 55 | Squamous carcinoma | IVA  | Mid-Ad |
| C1803008  | Chinese | Male   | 70 | Squamous carcinoma | IVA  | Mid-Ad |
| C1803084  | Chinese | Female | 67 | Squamous carcinoma | IVA  | Mid-Ad |
| C1906078  | Chinese | Female | 55 | -                  | -    | HC     |
| C1906079  | Chinese | Male   | 56 | -                  | -    | HC     |
| C1906080  | Chinese | Male   | 57 | -                  | -    | HC     |
| C1803054  | Chinese | Male   | 53 | -                  | -    | HC     |
| C1803056  | Chinese | Male   | 48 | -                  | -    | HC     |
| C1803055  | Chinese | Male   | 56 | -                  | -    | HC     |
| C1803057  | Chinese | Male   | 58 | -                  | -    | HC     |
| C1803058  | Chinese | Male   | 63 | -                  | -    | HC     |
| C1803059  | Chinese | Male   | 53 | -                  | -    | HC     |
| C1803060  | Chinese | Female | 51 | -                  | -    | HC     |
| C1803063  | Chinese | Female | 60 | -                  | -    | HC     |
| C1803064  | Chinese | Male   | 56 | -                  | -    | HC     |
| C1803065  | Chinese | Female | 56 | -                  | -    | HC     |
| C1803067  | Chinese | Female | 58 | -                  | -    | HC     |
| C1803066  | Chinese | Female | 55 | -                  | -    | HC     |
| C1906083  | Chinese | Male   | 63 | -                  | -    | HC     |
| C1803068  | Chinese | Male   | 69 | -                  | -    | HC     |
| C1803073  | Chinese | Male   | 57 | -                  | -    | HC     |
| C1803074  | Chinese | Male   | 64 | -                  | -    | HC     |
| C2005344  | Chinese | Male   | 67 | -                  | -    | HC     |
| C1906088  | Chinese | Male   | 57 | -                  | -    | HC     |

|          |         |        |        |   |   |    |
|----------|---------|--------|--------|---|---|----|
| C1906089 | Chinese | Female | 54     | - | - | HC |
| C1906090 | Chinese | Female | 67     | - | - | HC |
| C1906091 | Chinese | Male   | 61     | - | - | HC |
| C1906092 | Chinese | Male   | 52     | - | - | HC |
| C1906094 | Chinese | Male   | 52     | - | - | HC |
| C1906097 | Chinese | Male   | 51     | - | - | HC |
| C1906098 | Chinese | Male   | 50     | - | - | HC |
| C2005312 | Chinese | Male   | 52     | - | - | HC |
| C2005313 | Chinese | Male   | 52     | - | - | HC |
| C2005314 | Chinese | Female | 57     | - | - | HC |
| C2005315 | Chinese | Female | 52     | - | - | HC |
| C2005316 | Chinese | Male   | 58     | - | - | HC |
| C2005317 | Chinese | Male   | 68     | - | - | HC |
| C2005318 | Chinese | Male   | 58     | - | - | HC |
| C2005321 | Chinese | Male   | 61     | - | - | HC |
| C2005322 | Chinese | Male   | 63     | - | - | HC |
| C2005323 | Chinese | Male   | 58     | - | - | HC |
| C2005324 | Chinese | Female | 60     | - | - | HC |
| C2005331 | Chinese | Male   | 65     | - | - | HC |
| C2005332 | Chinese | Male   | 70     | - | - | HC |
| C2005333 | Chinese | Male   | 63     | - | - | HC |
| C2005334 | Chinese | Male   | 65     | - | - | HC |
| C2005335 | Chinese | Male   | 61     | - | - | HC |
| C2005336 | Chinese | Male   | 51     | - | - | HC |
| C2005337 | Chinese | Female | 52     | - | - | HC |
| C2005338 | Chinese | Female | 66     | - | - | HC |
| C2005339 | Chinese | Male   | 54     | - | - | HC |
| C2005342 | Chinese | Male   | 61     | - | - | HC |
| C2005341 | Chinese | Male   | 69     | - | - | HC |
| C1801631 | Chinese | female | 50     | - | - | HC |
| C180109Z | Chinese | male   | unknow | - | - | HC |
| C1801479 | Chinese | female | 43     | - | - | HC |
| C1801501 | Chinese | male   | 44     | - | - | HC |
| C1801200 | Chinese | male   | 67     | - | - | HC |
| C1800147 | Chinese | male   | 56     | - | - | HC |
| C1801406 | Chinese | male   | 53     | - | - | HC |
| C1800170 | Chinese | male   | 49     | - | - | HC |
| C1801303 | Chinese | male   | 54     | - | - | HC |
| C1800129 | Chinese | male   | 43     | - | - | HC |
| C1800116 | Chinese | female | 40     | - | - | HC |
| C1800117 | Chinese | male   | 45     | - | - | HC |
| C1801453 | Chinese | male   | 68     | - | - | HC |

|          |         |        |    |   |   |    |
|----------|---------|--------|----|---|---|----|
| C1801224 | Chinese | male   | 60 | - | - | HC |
| C1801418 | Chinese | male   | 70 | - | - | HC |
| C1801554 | Chinese | male   | 59 | - | - | HC |
| C1801565 | Chinese | male   | 69 | - | - | HC |
| C1801656 | Chinese | male   | 71 | - | - | HC |
| C1801233 | Chinese | male   | 65 | - | - | HC |
| C1801516 | Chinese | male   | 67 | - | - | HC |
| C1801524 | Chinese | female | 49 | - | - | HC |

---

Note: Mid-Ad, middle to advanced; HC, healthy controls.

**Table S2 List of annotated 5hmC marker genes used in model construction.**

| seqnames | start    | end      | width  | annotation               | geneChr | geneStart |
|----------|----------|----------|--------|--------------------------|---------|-----------|
| chr19    | 46436992 | 46477123 | 40132  | Promoter (<=1kb)         | 19      | 46442771  |
| chr19    | 48216679 | 48246391 | 29713  | Promoter (<=1kb)         | 19      | 48216601  |
| chr19    | 48741518 | 48759203 | 17686  | Promoter (<=1kb)         | 19      | 48758932  |
| chr19    | 48829256 | 48833810 | 4555   | Promoter (<=1kb)         | 19      | 48828629  |
| chr19    | 49223842 | 49243867 | 20026  | Promoter (<=1kb)         | 19      | 49223842  |
| chr19    | 49458132 | 49465055 | 6924   | Promoter (<=1kb)         | 19      | 49458117  |
| chr19    | 50433461 | 50437193 | 3733   | Promoter (<=1kb)         | 19      | 50436321  |
| chr19    | 51279398 | 51289467 | 10070  | J21uyg.1/uc021uyg.1, ex  | 19      | 51293672  |
| chr19    | 55141968 | 55149007 | 7040   | Promoter (<=1kb)         | 19      | 55141968  |
| chr19    | 56511092 | 56573176 | 62085  | Promoter (<=1kb)         | 19      | 56511092  |
| chr19    | 56613019 | 56632664 | 19646  | Promoter (<=1kb)         | 19      | 56598732  |
| chr2     | 10508890 | 10567743 | 58854  | Promoter (<=1kb)         | 2       | 10508890  |
| chr2     | 12147242 | 12718474 | 571233 | 002rbu.1/uc002rbu.1, exc | 2       | 12856998  |
| chr2     | 16730727 | 16847102 | 116376 | Promoter (<=1kb)         | 2       | 16730730  |
| chr2     | 27938990 | 27962154 | 23165  | Distal Intergenic        | 2       | 27994584  |
| chr2     | 27994586 | 28002600 | 8015   | Promoter (<=1kb)         | 2       | 27994584  |
| chr2     | 38294746 | 38303323 | 8578   | Promoter (<=1kb)         | 2       | 38294746  |
| chr2     | 44544746 | 44589001 | 44256  | Promoter (<=1kb)         | 2       | 44544748  |
| chr2     | 46524546 | 46613836 | 89291  | Promoter (<=1kb)         | 2       | 46606839  |
| chr2     | 48541821 | 48606434 | 64614  | Promoter (<=1kb)         | 2       | 48541795  |
| chr2     | 54785531 | 54889445 | 103915 | Promoter (<=1kb)         | 2       | 54785531  |
| chr2     | 61704984 | 61765491 | 60508  | Promoter (<=1kb)         | 2       | 61705069  |
| chr2     | 62442656 | 62451866 | 9211   | 5' UTR                   | 2       | 62432961  |
| chr2     | 64319786 | 64371554 | 51769  | Promoter (<=1kb)         | 2       | 64319786  |
| chr2     | 65313988 | 65357435 | 43448  | Promoter (<=1kb)         | 2       | 65313988  |
| chr2     | 65454829 | 65498387 | 43559  | Promoter (<=1kb)         | 2       | 65454829  |
| chr2     | 66650474 | 66660602 | 10129  | Promoter (<=1kb)         | 2       | 66650475  |
| chr2     | 68405989 | 68479664 | 73676  | Promoter (<=1kb)         | 2       | 68405989  |
| chr2     | 74379725 | 74405441 | 25717  | Promoter (<=1kb)         | 2       | 74383211  |
| chr2     | 74781287 | 74784678 | 3392   | Promoter (<=1kb)         | 2       | 74781512  |
| chr2     | 85198284 | 85286595 | 88312  | Promoter (<=1kb)         | 2       | 85198231  |
| chr2     | 95534430 | 95613087 | 78658  | Promoter (<=1kb)         | 2       | 95537232  |
| chr2     | 99764727 | 99771429 | 6703   | Promoter (<=1kb)         | 2       | 99771418  |
| chr2     | 1.02E+08 | 1.02E+08 | 33101  | Promoter (<=1kb)         | 2       | 1.02E+08  |
| chr2     | 1.07E+08 | 1.07E+08 | 9282   | Promoter (<=1kb)         | 2       | 1.07E+08  |
| chr2     | 1.12E+08 | 1.12E+08 | 65853  | Promoter (<=1kb)         | 2       | 1.12E+08  |
| chr2     | 1.13E+08 | 1.13E+08 | 17887  | Promoter (<=1kb)         | 2       | 1.13E+08  |
| chr2     | 1.14E+08 | 1.14E+08 | 25435  | Promoter (<=1kb)         | 2       | 1.14E+08  |
| chr2     | 1.15E+08 | 1.15E+08 | 70957  | Promoter (<=1kb)         | 2       | 1.15E+08  |
| chr2     | 1.28E+08 | 1.28E+08 | 43365  | Promoter (<=1kb)         | 2       | 1.28E+08  |
| chr2     | 1.36E+08 | 1.36E+08 | 40521  | Promoter (<=1kb)         | 2       | 1.36E+08  |
| chr2     | 1.53E+08 | 1.54E+08 | 314653 | Promoter (<=1kb)         | 2       | 1.53E+08  |
| chr2     | 1.75E+08 | 1.75E+08 | 59244  | Promoter (<=1kb)         | 2       | 1.75E+08  |
| chr2     | 1.78E+08 | 1.78E+08 | 34420  | Promoter (<=1kb)         | 2       | 1.78E+08  |
| chr2     | 1.78E+08 | 1.79E+08 | 293438 | Promoter (<=1kb)         | 2       | 1.78E+08  |
| chr2     | 1.92E+08 | 1.92E+08 | 38714  | Promoter (<=1kb)         | 2       | 1.92E+08  |
| chr2     | 2.02E+08 | 2.02E+08 | 32414  | Promoter (<=1kb)         | 2       | 2.02E+08  |

|       |          |          |        |                   |    |          |
|-------|----------|----------|--------|-------------------|----|----------|
| chr2  | 2.02E+08 | 2.02E+08 | 84859  | Promoter (<=1kb)  | 2  | 2.02E+08 |
| chr2  | 2.08E+08 | 2.08E+08 | 46867  | Promoter (<=1kb)  | 2  | 2.08E+08 |
| chr2  | 2.14E+08 | 2.14E+08 | 11895  | Distal Intergenic | 2  | 2.14E+08 |
| chr2  | 2.18E+08 | 2.18E+08 | 4870   | 3' UTR            | 2  | 2.17E+08 |
| chr2  | 2.19E+08 | 2.19E+08 | 36952  | Promoter (<=1kb)  | 2  | 2.19E+08 |
| chr2  | 2.19E+08 | 2.19E+08 | 14622  | Promoter (<=1kb)  | 2  | 2.19E+08 |
| chr2  | 2.35E+08 | 2.35E+08 | 2973   | Promoter (<=1kb)  | 2  | 2.35E+08 |
| chr2  | 2.39E+08 | 2.39E+08 | 73711  | Promoter (<=1kb)  | 2  | 2.39E+08 |
| chr2  | 2.39E+08 | 2.39E+08 | 6565   | Promoter (<=1kb)  | 2  | 2.39E+08 |
| chr20 | 627259   | 633844   | 6586   | Promoter (<=1kb)  | 20 | 627268   |
| chr20 | 825286   | 826920   | 1635   | Promoter (<=1kb)  | 20 | 825285   |
| chr20 | 3870463  | 3910534  | 40072  | Promoter (<=1kb)  | 20 | 3898149  |
| chr20 | 5525085  | 5591652  | 66568  | Promoter (<=1kb)  | 20 | 5525080  |
| chr20 | 10618332 | 10654647 | 36316  | Promoter (<=1kb)  | 20 | 10622108 |
| chr20 | 19870210 | 19983103 | 112894 | Promoter (<=1kb)  | 20 | 19870210 |
| chr20 | 23614294 | 23618592 | 4299   | Promoter (<=1kb)  | 20 | 23608534 |
| chr20 | 35521096 | 35580111 | 59016  | Promoter (<=1kb)  | 20 | 35520227 |
| chr20 | 36145819 | 36156333 | 10515  | Promoter (<=1kb)  | 20 | 36145819 |
| chr20 | 36766345 | 36793672 | 27328  | Promoter (<=1kb)  | 20 | 36756864 |
| chr20 | 37434340 | 37551667 | 117328 | Promoter (<=1kb)  | 20 | 37434348 |
| chr20 | 42574536 | 42698256 | 123721 | Promoter (<=1kb)  | 20 | 42574536 |
| chr20 | 44563322 | 44576659 | 13338  | Promoter (<=1kb)  | 20 | 44573507 |
| chr20 | 45186467 | 45313124 | 126658 | Promoter (<=1kb)  | 20 | 45186462 |
| chr20 | 46130631 | 46285616 | 154986 | Promoter (<=1kb)  | 20 | 46255746 |
| chr20 | 48519928 | 48532066 | 12139  | Promoter (<=1kb)  | 20 | 48519929 |
| chr20 | 49126920 | 49201778 | 74859  | Promoter (<=1kb)  | 20 | 49126891 |
| chr20 | 55966452 | 55984389 | 17938  | Promoter (<=1kb)  | 20 | 55966454 |
| chr20 | 57467218 | 57475554 | 8337   | Promoter (<=1kb)  | 20 | 57472495 |
| chr20 | 60697531 | 60710430 | 12900  | Promoter (<=1kb)  | 20 | 60698193 |
| chr20 | 60878053 | 60883918 | 5866   | Promoter (<=1kb)  | 20 | 60880362 |
| chr20 | 61273855 | 61303645 | 29791  | Promoter (<=1kb)  | 20 | 61294379 |
| chr20 | 62185512 | 62188048 | 2537   | Promoter (1-2kb)  | 20 | 62184373 |
| chr21 | 30677525 | 30734217 | 56693  | Promoter (<=1kb)  | 21 | 30677560 |
| chr21 | 34602243 | 34637969 | 35727  | Promoter (<=1kb)  | 21 | 34621014 |
| chr21 | 34775202 | 34809828 | 34627  | Promoter (<=1kb)  | 21 | 34775202 |
| chr21 | 45553565 | 45565593 | 12029  | Promoter (<=1kb)  | 21 | 45553494 |
| chr22 | 17618410 | 17646177 | 27768  | Promoter (<=1kb)  | 22 | 17640279 |
| chr22 | 20119327 | 20135530 | 16204  | Promoter (<=1kb)  | 22 | 20119364 |
| chr22 | 21922003 | 21978323 | 56321  | Promoter (<=1kb)  | 22 | 21922019 |
| chr22 | 22123319 | 22221970 | 98652  | Promoter (<=1kb)  | 22 | 22113947 |
| chr22 | 31644370 | 31676066 | 31697  | Promoter (<=1kb)  | 22 | 31644348 |
| chr22 | 36677323 | 36784112 | 106790 | Promoter (<=1kb)  | 22 | 36677323 |
| chr22 | 43265779 | 43411155 | 145377 | Promoter (<=1kb)  | 22 | 43265772 |
| chr22 | 45714324 | 45737836 | 23513  | Promoter (<=1kb)  | 22 | 45725525 |
| chr22 | 46481877 | 46509808 | 27932  | Promoter (<=1kb)  | 22 | 46486924 |
| chr22 | 47169824 | 47571342 | 401519 | Promoter (<=1kb)  | 22 | 47169824 |
| chr22 | 50964181 | 50968514 | 4334   | Promoter (<=1kb)  | 22 | 50964181 |
| chr3  | 9799031  | 9811631  | 12601  | Promoter (<=1kb)  | 3  | 9799031  |
| chr3  | 14444106 | 14530857 | 86752  | Promoter (<=1kb)  | 3  | 14444076 |
| chr3  | 18486729 | 18571606 | 84878  | Distal Intergenic | 3  | 18389133 |



|      |          |          |        |                            |   |          |
|------|----------|----------|--------|----------------------------|---|----------|
| chr3 | 30648093 | 30735634 | 87542  | Promoter (<=1kb)           | 3 | 30647994 |
| chr3 | 32433345 | 32497020 | 63676  | Promoter (<=1kb)           | 3 | 32433163 |
| chr3 | 38738837 | 38835501 | 96665  | Promoter (<=1kb)           | 3 | 38738837 |
| chr3 | 41240996 | 41281934 | 40939  | Promoter (<=1kb)           | 3 | 41277163 |
| chr3 | 46395602 | 46402420 | 6819   | Promoter (<=1kb)           | 3 | 46395235 |
| chr3 | 49396578 | 49449409 | 52832  | Promoter (<=1kb)           | 3 | 49396579 |
| chr3 | 50712358 | 51421629 | 709272 | Promoter (<=1kb)           | 3 | 50712511 |
| chr3 | 52082935 | 52090587 | 7653   | Promoter (<=1kb)           | 3 | 52082937 |
| chr3 | 52489620 | 52527084 | 37465  | Promoter (<=1kb)           | 3 | 52518408 |
| chr3 | 57994149 | 58157978 | 163830 | Promoter (<=1kb)           | 3 | 58063983 |
| chr3 | 60873925 | 61237126 | 363202 | Promoter (<=1kb)           | 3 | 59735036 |
| chr3 | 1.09E+08 | 1.09E+08 | 46052  | Promoter (<=1kb)           | 3 | 1.09E+08 |
| chr3 | 1.25E+08 | 1.25E+08 | 90288  | Promoter (<=1kb)           | 3 | 1.25E+08 |
| chr3 | 1.25E+08 | 1.25E+08 | 130130 | Promoter (<=1kb)           | 3 | 1.25E+08 |
| chr3 | 1.29E+08 | 1.29E+08 | 73662  | Promoter (<=1kb)           | 3 | 1.29E+08 |
| chr3 | 1.32E+08 | 1.33E+08 | 152462 | Promoter (<=1kb)           | 3 | 1.32E+08 |
| chr3 | 1.36E+08 | 1.36E+08 | 47419  | Promoter (<=1kb)           | 3 | 1.36E+08 |
| chr3 | 1.52E+08 | 1.52E+08 | 166376 | Promoter (<=1kb)           | 3 | 1.52E+08 |
| chr3 | 1.75E+08 | 1.76E+08 | 951213 | Promoter (<=1kb)           | 3 | 1.75E+08 |
| chr3 | 1.93E+08 | 1.93E+08 | 121042 | Promoter (<=1kb)           | 3 | 1.93E+08 |
| chr3 | 1.96E+08 | 1.96E+08 | 22311  | Promoter (<=1kb)           | 3 | 1.96E+08 |
| chr3 | 1.96E+08 | 1.97E+08 | 92791  | Promoter (<=1kb)           | 3 | 1.96E+08 |
| chr4 | 8201017  | 8242830  | 41814  | Promoter (<=1kb)           | 4 | 8201060  |
| chr4 | 26483018 | 26492106 | 9089   | Promoter (<=1kb)           | 4 | 26483018 |
| chr4 | 38665820 | 38703138 | 37319  | Promoter (<=1kb)           | 4 | 38614322 |
| chr4 | 56212409 | 56239267 | 26859  | Promoter (<=1kb)           | 4 | 56212388 |
| chr4 | 56262124 | 56292342 | 30219  | Promoter (<=1kb)           | 4 | 56262080 |
| chr4 | 71457973 | 71473005 | 15033  | Promoter (<=1kb)           | 4 | 71457975 |
| chr4 | 1.21E+08 | 1.21E+08 | 5410   | uc003idk.1/uc003idk.1, exc | 4 | 1.2E+08  |
| chr4 | 1.42E+08 | 1.42E+08 | 273663 | Promoter (<=1kb)           | 4 | 1.42E+08 |
| chr4 | 1.59E+08 | 1.59E+08 | 48552  | Promoter (<=1kb)           | 4 | 1.59E+08 |
| chr4 | 1.6E+08  | 1.6E+08  | 92365  | Promoter (<=1kb)           | 4 | 1.6E+08  |
| chr4 | 1.85E+08 | 1.85E+08 | 86822  | Promoter (<=1kb)           | 4 | 1.85E+08 |
| chr5 | 9035145  | 9546187  | 511043 | Promoter (<=1kb)           | 5 | 9053928  |
| chr5 | 14143451 | 14510313 | 366863 | Promoter (<=1kb)           | 5 | 14143829 |
| chr5 | 43016150 | 43018913 | 2764   | Promoter (<=1kb)           | 5 | 43014831 |
| chr5 | 53813589 | 53842416 | 28828  | Promoter (<=1kb)           | 5 | 53813589 |
| chr5 | 55807109 | 55902083 | 94975  | Distal Intergenic          | 5 | 56110900 |
| chr5 | 56111376 | 56191979 | 80604  | Promoter (<=1kb)           | 5 | 56110900 |
| chr5 | 67588405 | 67597649 | 9245   | Promoter (<=1kb)           | 5 | 67588511 |
| chr5 | 73923231 | 73937249 | 14019  | Promoter (<=1kb)           | 5 | 73935848 |
| chr5 | 81569139 | 81574173 | 5035   | Promoter (<=1kb)           | 5 | 81569139 |
| chr5 | 1.02E+08 | 1.02E+08 | 62973  | uc003knr.1/uc003knr.1, exc | 5 | 1.02E+08 |
| chr5 | 1.09E+08 | 1.09E+08 | 75253  | Promoter (<=1kb)           | 5 | 1.09E+08 |
| chr5 | 1.28E+08 | 1.28E+08 | 68148  | Promoter (<=1kb)           | 5 | 1.28E+08 |
| chr5 | 1.32E+08 | 1.32E+08 | 65116  | Promoter (<=1kb)           | 5 | 1.32E+08 |
| chr5 | 1.38E+08 | 1.38E+08 | 59635  | Promoter (<=1kb)           | 5 | 1.38E+08 |
| chr5 | 1.39E+08 | 1.39E+08 | 37928  | Promoter (<=1kb)           | 5 | 1.39E+08 |
| chr5 | 1.39E+08 | 1.39E+08 | 67096  | Promoter (<=1kb)           | 5 | 1.39E+08 |
| chr5 | 1.4E+08  | 1.4E+08  | 58067  | Promoter (<=1kb)           | 5 | 1.4E+08  |

|      |          |          |        |                    |   |          |
|------|----------|----------|--------|--------------------|---|----------|
| chr5 | 1.41E+08 | 1.41E+08 | 15759  | Promoter (<=1kb)   | 5 | 1.41E+08 |
| chr5 | 1.42E+08 | 1.43E+08 | 457785 | Promoter (<=1kb)   | 5 | 1.42E+08 |
| chr5 | 1.48E+08 | 1.48E+08 | 172976 | Promoter (<=1kb)   | 5 | 1.48E+08 |
| chr5 | 1.49E+08 | 1.49E+08 | 58458  | Promoter (<=1kb)   | 5 | 1.49E+08 |
| chr5 | 1.5E+08  | 1.5E+08  | 10477  | Distal Intergenic  | 5 | 1.5E+08  |
| chr5 | 1.5E+08  | 1.5E+08  | 8398   | Promoter (<=1kb)   | 5 | 1.5E+08  |
| chr5 | 1.71E+08 | 1.72E+08 | 146146 | Promoter (<=1kb)   | 5 | 1.71E+08 |
| chr5 | 1.77E+08 | 1.77E+08 | 5385   | Promoter (<=1kb)   | 5 | 1.77E+08 |
| chr5 | 1.79E+08 | 1.79E+08 | 17174  | Promoter (<=1kb)   | 5 | 1.79E+08 |
| chr5 | 1.8E+08  | 1.8E+08  | 2448   | uc011dhb.1, exon 1 | 5 | 1.8E+08  |
| chr5 | 1.8E+08  | 1.8E+08  | 20736  | Promoter (<=1kb)   | 5 | 1.8E+08  |
| chr6 | 12290594 | 12297427 | 6834   | Promoter (<=1kb)   | 6 | 12290529 |
| chr6 | 16129317 | 16148479 | 19163  | Promoter (<=1kb)   | 6 | 16141787 |
| chr6 | 18522978 | 18723129 | 200152 | Promoter (<=1kb)   | 6 | 18572015 |
| chr6 | 36646491 | 36655109 | 8619   | Promoter (<=1kb)   | 6 | 36646487 |
| chr6 | 39657754 | 39693199 | 35446  | Promoter (<=1kb)   | 6 | 39302876 |
| chr6 | 40846625 | 40991019 | 144395 | Distal Intergenic  | 6 | 40994640 |
| chr6 | 44081191 | 44095228 | 14038  | Promoter (<=1kb)   | 6 | 44081373 |
| chr6 | 46820259 | 46922676 | 102418 | Promoter (<=1kb)   | 6 | 46820242 |
| chr6 | 49801970 | 49844809 | 42840  | Promoter (<=1kb)   | 6 | 49801979 |
| chr6 | 52362206 | 52441858 | 79653  | Promoter (<=1kb)   | 6 | 52370340 |
| chr6 | 52761444 | 52774496 | 13053  | Promoter (<=1kb)   | 6 | 52761439 |
| chr6 | 53512714 | 53530554 | 17841  | Promoter (<=1kb)   | 6 | 53512699 |
| chr6 | 62389866 | 62996130 | 606265 | Promoter (<=1kb)   | 6 | 62389865 |
| chr6 | 88384578 | 88411951 | 27374  | Promoter (<=1kb)   | 6 | 88384578 |
| chr6 | 1.01E+08 | 1.01E+08 | 74802  | Promoter (<=1kb)   | 6 | 1.01E+08 |
| chr6 | 1.1E+08  | 1.1E+08  | 21907  | Promoter (<=1kb)   | 6 | 1.1E+08  |
| chr6 | 1.11E+08 | 1.12E+08 | 143692 | Promoter (<=1kb)   | 6 | 1.11E+08 |
| chr6 | 1.33E+08 | 1.33E+08 | 51643  | Promoter (<=1kb)   | 6 | 1.33E+08 |
| chr6 | 1.37E+08 | 1.37E+08 | 32989  | Promoter (<=1kb)   | 6 | 1.37E+08 |
| chr6 | 1.39E+08 | 1.4E+08  | 45723  | Promoter (<=1kb)   | 6 | 1.39E+08 |
| chr6 | 1.44E+08 | 1.44E+08 | 73870  | Promoter (<=1kb)   | 6 | 1.44E+08 |
| chr6 | 1.45E+08 | 1.45E+08 | 561298 | Promoter (<=1kb)   | 6 | 1.45E+08 |
| chr6 | 1.49E+08 | 1.49E+08 | 42900  | Promoter (<=1kb)   | 6 | 1.49E+08 |
| chr6 | 1.58E+08 | 1.58E+08 | 121832 | Promoter (<=1kb)   | 6 | 1.58E+08 |
| chr6 | 1.59E+08 | 1.59E+08 | 99000  | Promoter (<=1kb)   | 6 | 1.59E+08 |
| chr6 | 1.59E+08 | 1.59E+08 | 8270   | Promoter (<=1kb)   | 6 | 1.59E+08 |
| chr6 | 1.59E+08 | 1.59E+08 | 16516  | Promoter (<=1kb)   | 6 | 1.59E+08 |
| chr6 | 1.6E+08  | 1.6E+08  | 2410   | Promoter (<=1kb)   | 6 | 1.6E+08  |
| chr6 | 1.64E+08 | 1.64E+08 | 163875 | Promoter (<=1kb)   | 6 | 1.64E+08 |
| chr7 | 881011   | 914571   | 33561  | Promoter (<=1kb)   | 7 | 882978   |
| chr7 | 2559408  | 2568811  | 9404   | Promoter (<=1kb)   | 7 | 2566708  |
| chr7 | 4721926  | 4811073  | 89148  | Promoter (<=1kb)   | 7 | 4721930  |
| chr7 | 5553485  | 5565176  | 11692  | Promoter (<=1kb)   | 7 | 5528809  |
| chr7 | 5632447  | 5646286  | 13840  | Promoter (<=1kb)   | 7 | 5642503  |
| chr7 | 5659678  | 5821294  | 161617 | Promoter (<=1kb)   | 7 | 5702063  |
| chr7 | 6201410  | 6312255  | 110846 | Promoter (<=1kb)   | 7 | 6201412  |
| chr7 | 6414158  | 6443598  | 29441  | Promoter (<=1kb)   | 7 | 6414126  |
| chr7 | 6448760  | 6487585  | 38826  | Promoter (<=1kb)   | 7 | 6448747  |
| chr7 | 26191818 | 26226757 | 34940  | Promoter (<=1kb)   | 7 | 26191847 |

|      |          |          |        |                  |   |          |
|------|----------|----------|--------|------------------|---|----------|
| chr7 | 30464143 | 30518482 | 54340  | Promoter (<=1kb) | 7 | 30464143 |
| chr7 | 31377079 | 31380340 | 3262   | Promoter (<=1kb) | 7 | 31377075 |
| chr7 | 32907784 | 32931372 | 23589  | Promoter (<=1kb) | 7 | 32907778 |
| chr7 | 36892511 | 37025871 | 133361 | Promoter (<=1kb) | 7 | 36958962 |
| chr7 | 43152246 | 43605600 | 453355 | Promoter (<=1kb) | 7 | 43190494 |
| chr7 | 44111661 | 44122139 | 10479  | Promoter (<=1kb) | 7 | 44111847 |
| chr7 | 48128862 | 48148333 | 19472  | Promoter (<=1kb) | 7 | 48128851 |
| chr7 | 55538306 | 55640195 | 101890 | Promoter (<=1kb) | 7 | 55538306 |
| chr7 | 71244476 | 71912128 | 667653 | Promoter (<=1kb) | 7 | 71244476 |
| chr7 | 73588686 | 73611426 | 22741  | Promoter (<=1kb) | 7 | 73605528 |
| chr7 | 74072044 | 74175022 | 102979 | Promoter (<=1kb) | 7 | 74163362 |
| chr7 | 75162619 | 75368259 | 205641 | Promoter (<=1kb) | 7 | 75162619 |
| chr7 | 75956116 | 75988308 | 32193  | Promoter (<=1kb) | 7 | 75956108 |
| chr7 | 93053800 | 93204042 | 150243 | Promoter (<=1kb) | 7 | 93113248 |
| chr7 | 98625063 | 98741731 | 116669 | Promoter (<=1kb) | 7 | 98625058 |
| chr7 | 98972353 | 98992439 | 20087  | Promoter (<=1kb) | 7 | 98972298 |
| chr7 | 1E+08    | 1E+08    | 4288   | Promoter (<=1kb) | 7 | 1E+08    |
| chr7 | 1E+08    | 1E+08    | 12696  | Promoter (<=1kb) | 7 | 1E+08    |
| chr7 | 1.02E+08 | 1.02E+08 | 29423  | Promoter (<=1kb) | 7 | 1.02E+08 |
| chr7 | 1.03E+08 | 1.03E+08 | 71971  | Promoter (<=1kb) | 7 | 1.03E+08 |
| chr7 | 1.04E+08 | 1.05E+08 | 579902 | Promoter (<=1kb) | 7 | 1.04E+08 |
| chr7 | 1.05E+08 | 1.05E+08 | 9419   | Promoter (<=1kb) | 7 | 1.05E+08 |
| chr7 | 1.05E+08 | 1.05E+08 | 100815 | Promoter (<=1kb) | 7 | 1.05E+08 |
| chr7 | 1.07E+08 | 1.07E+08 | 37755  | Promoter (<=1kb) | 7 | 1.07E+08 |
| chr7 | 1.16E+08 | 1.16E+08 | 34818  | Promoter (<=1kb) | 7 | 1.16E+08 |
| chr7 | 1.17E+08 | 1.17E+08 | 59463  | Promoter (<=1kb) | 7 | 1.17E+08 |
| chr7 | 1.24E+08 | 1.24E+08 | 13519  | Promoter (<=1kb) | 7 | 1.24E+08 |
| chr7 | 1.31E+08 | 1.31E+08 | 165757 | Promoter (<=1kb) | 7 | 1.31E+08 |
| chr7 | 1.31E+08 | 1.31E+08 | 56358  | Promoter (<=1kb) | 7 | 1.31E+08 |
| chr7 | 1.35E+08 | 1.35E+08 | 5047   | Promoter (<=1kb) | 7 | 1.35E+08 |
| chr7 | 1.39E+08 | 1.39E+08 | 49381  | Promoter (<=1kb) | 7 | 1.39E+08 |
| chr7 | 1.43E+08 | 1.43E+08 | 7663   | Promoter (<=1kb) | 7 | 1.43E+08 |
| chr7 | 1.5E+08  | 1.5E+08  | 28764  | Promoter (<=1kb) | 7 | 1.5E+08  |
| chr7 | 1.5E+08  | 1.5E+08  | 7274   | Promoter (<=1kb) | 7 | 1.5E+08  |
| chr8 | 1711955  | 1734736  | 22782  | Promoter (<=1kb) | 8 | 1711870  |
| chr8 | 8175258  | 8243949  | 68692  | Promoter (<=1kb) | 8 | 8175258  |
| chr8 | 11700033 | 11725596 | 25564  | Promoter (<=1kb) | 8 | 11700034 |
| chr8 | 21766384 | 21771201 | 4818   | Promoter (<=1kb) | 8 | 21563902 |
| chr8 | 23082734 | 23088439 | 5706   | Promoter (<=1kb) | 8 | 23082734 |
| chr8 | 24153327 | 24406131 | 252805 | Promoter (<=1kb) | 8 | 24184067 |
| chr8 | 26150732 | 26230196 | 79465  | Promoter (<=1kb) | 8 | 26150732 |
| chr8 | 26435921 | 26515691 | 79771  | Promoter (<=1kb) | 8 | 26435921 |
| chr8 | 28203107 | 28243977 | 40871  | Promoter (<=1kb) | 8 | 28203102 |
| chr8 | 28924795 | 29120587 | 195793 | Promoter (<=1kb) | 8 | 28924795 |
| chr8 | 29779029 | 29811125 | 32097  | Promoter (<=1kb) | 8 | 29779029 |
| chr8 | 29952924 | 29995864 | 42941  | Promoter (<=1kb) | 8 | 29952922 |
| chr8 | 40388109 | 40755345 | 367237 | Promoter (<=1kb) | 8 | 40388111 |
| chr8 | 41799567 | 41909505 | 109939 | Promoter (<=1kb) | 8 | 41786997 |
| chr8 | 42032236 | 42065083 | 32848  | Promoter (<=1kb) | 8 | 42032236 |
| chr8 | 42128820 | 42189978 | 61159  | Promoter (<=1kb) | 8 | 42128820 |

|      |          |          |         |                    |   |          |
|------|----------|----------|---------|--------------------|---|----------|
| chr8 | 56792394 | 56926728 | 134335  | Promoter (<=1kb)   | 8 | 56792386 |
| chr8 | 61429546 | 61536203 | 106658  | Promoter (<=1kb)   | 8 | 61429469 |
| chr8 | 91804003 | 91971621 | 167619  | Promoter (<=1kb)   | 8 | 91952967 |
| chr8 | 96281064 | 96822371 | 541308  | Promoter (<=1kb)   | 8 | 96281064 |
| chr8 | 97274130 | 97349223 | 75094   | Promoter (<=1kb)   | 8 | 97274167 |
| chr8 | 1.01E+08 | 1.01E+08 | 145114  | Promoter (<=1kb)   | 8 | 1.01E+08 |
| chr8 | 1.29E+08 | 1.29E+08 | 306721  | Promoter (<=1kb)   | 8 | 1.29E+08 |
| chr8 | 1.31E+08 | 1.31E+08 | 391571  | Promoter (<=1kb)   | 8 | 1.31E+08 |
| chr8 | 1.34E+08 | 1.34E+08 | 60078   | Promoter (<=1kb)   | 8 | 1.34E+08 |
| chr8 | 1.34E+08 | 1.35E+08 | 117040  | Promoter (<=1kb)   | 8 | 1.34E+08 |
| chr8 | 1.39E+08 | 1.39E+08 | 273872  | uc022bbu.1, exon 1 | 8 | 1.39E+08 |
| chr8 | 1.42E+08 | 1.42E+08 | 115478  | Promoter (<=1kb)   | 8 | 1.42E+08 |
| chr8 | 1.42E+08 | 1.42E+08 | 67216   | Promoter (<=1kb)   | 8 | 1.42E+08 |
| chr8 | 1.42E+08 | 1.42E+08 | 16647   | Promoter (<=1kb)   | 8 | 1.42E+08 |
| chr9 | 5163868  | 5185639  | 21772   | Promoter (<=1kb)   | 9 | 5163863  |
| chr9 | 8314246  | 10613002 | 2298757 | Promoter (<=1kb)   | 9 | 8314246  |
| chr9 | 19507450 | 19787017 | 279568  | Promoter (<=1kb)   | 9 | 19507450 |
| chr9 | 33817158 | 33920397 | 103240  | Promoter (<=1kb)   | 9 | 33817182 |
| chr9 | 35056061 | 35072665 | 16605   | Promoter (<=1kb)   | 9 | 35057373 |
| chr9 | 37668006 | 37746901 | 78896   | Promoter (<=1kb)   | 9 | 37715635 |
| chr9 | 72435733 | 72521143 | 85411   | Promoter (<=1kb)   | 9 | 72435731 |
| chr9 | 73398773 | 74061887 | 663115  | Promoter (<=1kb)   | 9 | 73424891 |
| chr9 | 74966341 | 74979508 | 13168   | Promoter (<=1kb)   | 9 | 74966341 |
| chr9 | 80331013 | 80646727 | 315715  | Promoter (<=1kb)   | 9 | 80335191 |
| chr9 | 95858499 | 95875565 | 17067   | Promoter (<=1kb)   | 9 | 95858450 |
| chr9 | 99837953 | 99844227 | 6275    | Promoter (<=1kb)   | 9 | 99837953 |

**Table S3A. List of 5' end motif biomarkers used in model construction.**

| <b>Motif</b> |
|--------------|
| AAAT         |
| AGTC         |
| AAAA         |
| AAAG         |
| AGTT         |
| GTAG         |
| TTAC         |
| TTAA         |
| GAAA         |
| GAAG         |
| GCTA         |
| ATAA         |
| CCAC         |
| ATAT         |
| CCAG         |
| TAAA         |
| TGTA         |
| CTCT         |
| CTCC         |
| TCTA         |
| CTCG         |
| CTAG         |
| AAGC         |
| ACGT         |
| AAGA         |
| GTGA         |
| GTGG         |
| CTAT         |
| GGCA         |
| GTGT         |
| TTCT         |
| AGGA         |
| AGGC         |
| GATT         |
| GACT         |
| AGGT         |
| TCAC         |

TTCA  
TTCC  
GACC  
GATA  
GATC  
GCCC  
GGAC  
CCTT  
GCCT  
ATCC  
ATCA  
CCTC  
CCTG  
CAGG  
TGGG  
TGGC  
TGGA  
TCGA  
TGGT  
TAGG  
ACTG  
TCGT  
TAGA  
ACAG  
ACAC  
ACAA  
AGAC  
AGAA  
ATTT  
AGAG  
GGAG  
ATTG  
ATTC  
ATTA  
TGAT  
TTTA  
TTTC  
CAAC  
GCAC

CTTC  
AATT  
TATG  
TCAA  
AATA  
AATG  
CTGC  
TATT  
GTTC  
GTCA  
AACA  
CTTA  
ACCC  
GGGC  
CTTT  
ACCT  
TGTT  
AACT  
GAGT  
AGCA  
TTGT  
GAGA  
TTGA  
TTGC  
TTGG  
CACT  
ATGA  
ATGG  
GGTC  
GCGC  
GCAA  
TGCC  
CCCA  
TGCA  
CACA  
CAAA  
CACC  
TACA  
TACC

CATA

CATG

TCCT

TCCC

TCCA



**Table S3B. List of NF biomarkers used in model construction.**

| Chr  | Region         | Start   | End     | Strand | Gene name   | Transcript id   |
|------|----------------|---------|---------|--------|-------------|-----------------|
| Chr1 | protein_coding | 1321862 | 1333684 | -      | CCNL2       | ENST00000408952 |
| Chr1 | protein_coding | 3.7E+07 | 3.7E+07 | -      | EVA1B       | ENST00000270824 |
| Chr1 | protein_coding | 4.1E+07 | 4.1E+07 | +      | CTPS1       | ENST00000372616 |
| Chr1 | protein_coding | 4.4E+07 | 4.4E+07 | +      | ST3GAL3     | ENST00000372369 |
| Chr1 | protein_coding | 4.5E+07 | 4.5E+07 | +      | BTBD19      | ENST00000450269 |
| Chr1 | protein_coding | 6.8E+07 | 6.8E+07 | +      | IL23R       | ENST00000395227 |
| Chr1 | protein_coding | 1E+08   | 1E+08   | +      | AMY2A       | ENST00000414303 |
| Chr1 | protein_coding | 1.5E+08 | 1.5E+08 | +      | CRCT1       | ENST00000368790 |
| Chr1 | protein_coding | 1.6E+08 | 1.6E+08 | +      | OR10Z1      | ENST00000361284 |
| Chr1 | lincRNA        | 1.8E+08 | 1.8E+08 | -      | GS1-122H1.2 | ENST00000608183 |
| Chr1 | protein_coding | 2.1E+08 | 2.1E+08 | -      | CD34        | ENST00000356522 |
| Chr1 | protein_coding | 2.3E+08 | 2.3E+08 | -      | HIST3H3     | ENST00000366696 |
| Chr1 | protein_coding | 2.4E+08 | 2.4E+08 | +      | FMN2        | ENST00000447095 |
| Chr2 | protein_coding | 3.7E+07 | 3.7E+07 | -      | AC007382.1  | ENST00000593798 |
| Chr2 | protein_coding | 4.5E+07 | 4.5E+07 | +      | CAMKMT      | ENST00000428929 |
| Chr2 | protein_coding | 4.7E+07 | 4.7E+07 | -      | CALM2       | ENST00000272298 |
| Chr2 | protein_coding | 1E+08   | 1E+08   | +      | PDCL3       | ENST00000416255 |
| Chr2 | lincRNA        | 1.2E+08 | 1.2E+08 | -      | AC093901.1  | ENST00000414886 |
| Chr2 | protein_coding | 1.6E+08 | 1.6E+08 | +      | GALNT13     | ENST00000422126 |
| Chr2 | protein_coding | 1.7E+08 | 1.7E+08 | -      | GRB14       | ENST00000263915 |
| Chr2 | protein_coding | 1.7E+08 | 1.7E+08 | +      | B3GALT1     | ENST00000392690 |
| Chr2 | protein_coding | 2E+08   | 2E+08   | -      | STK17B      | ENST00000449152 |
| Chr2 | protein_coding | 2E+08   | 2E+08   | -      | HSPD1       | ENST00000426480 |
| Chr2 | protein_coding | 2E+08   | 2E+08   | +      | NOP58       | ENST00000264279 |
| Chr2 | protein_coding | 2.2E+08 | 2.2E+08 | -      | MREG        | ENST00000424992 |
| Chr2 | protein_coding | 2.3E+08 | 2.3E+08 | -      | GPR55       | ENST00000392039 |
| Chr2 | protein_coding | 2.3E+08 | 2.3E+08 | +      | C2orf72     | ENST00000373640 |
| Chr2 | protein_coding | 2.3E+08 | 2.3E+08 | +      | INPP5D      | ENST00000415617 |
| Chr2 | protein_coding | 2.3E+08 | 2.3E+08 | +      | UGT1A8      | ENST00000609767 |
| Chr2 | protein_coding | 2.3E+08 | 2.3E+08 | +      | UGT1A3      | ENST00000482026 |
| Chr2 | protein_coding | 2.4E+08 | 2.4E+08 | -      | KIF1A       | ENST00000498729 |
| Chr3 | protein_coding | 9851672 | 9877173 | +      | TTLL3       | ENST00000426895 |
| Chr3 | protein_coding | 4E+07   | 4E+07   | +      | MOBP        | ENST00000451925 |
| Chr3 | protein_coding | 5E+07   | 5E+07   | -      | TMEM115     | ENST00000266025 |
| Chr3 | protein_coding | 5.2E+07 | 5.2E+07 | +      | ALAS1       | ENST00000394965 |
| Chr3 | protein_coding | 1.1E+08 | 1.1E+08 | +      | GTPBP8      | ENST00000383677 |
| Chr3 | protein_coding | 1.3E+08 | 1.3E+08 | +      | CEP63       | ENST00000514678 |
| Chr3 | lincRNA        | 2E+08   | 2E+08   | +      | LINC00969   | ENST00000596584 |
| Chr3 | protein_coding | 2E+08   | 2E+08   | -      | KIAA0226    | ENST00000273582 |

|      |                |         |         |   |               |                 |
|------|----------------|---------|---------|---|---------------|-----------------|
| Chr4 | protein_coding | 4269428 | 4291896 | - | LYAR          | ENST00000343470 |
| Chr4 | protein_coding | 4291924 | 4323512 | + | ZBTB49        | ENST00000355834 |
| Chr4 | lincRNA        | 1.8E+08 | 1.8E+08 | - | RP11-440I14.2 | ENST00000515178 |
| Chr4 | protein_coding | 1.8E+08 | 1.8E+08 | - | ASB5          | ENST00000505299 |
| Chr5 | lincRNA        | 1363697 | 1380182 | - | RP11-325I22.2 | ENST00000504989 |
| Chr5 | lincRNA        | 2.7E+07 | 2.7E+07 | - | CTD-2533K21.4 | ENST00000506032 |
| Chr5 | miRNA          | 2.8E+07 | 2.8E+07 | - | AC010455.1    | ENST00000408794 |
| Chr5 | protein_coding | 3.4E+07 | 3.4E+07 | - | C1QTNF3       | ENST00000231338 |
| Chr5 | protein_coding | 5.5E+07 | 5.5E+07 | - | IL6ST         | ENST00000381287 |
| Chr5 | protein_coding | 6E+07   | 6E+07   | + | NDUFAF2       | ENST00000296597 |
| Chr5 | protein_coding | 6.5E+07 | 6.5E+07 | + | PPWD1         | ENST00000505380 |
| Chr5 | protein_coding | 8.8E+07 | 8.8E+07 | - | MEF2C         | ENST00000437473 |
| Chr5 | lincRNA        | 9.1E+07 | 9.1E+07 | - | LUCAT1        | ENST00000511918 |
| Chr5 | protein_coding | 1E+08   | 1E+08   | + | PAM           | ENST00000438793 |
| Chr5 | protein_coding | 1.1E+08 | 1.1E+08 | + | MAN2A1        | ENST00000261483 |
| Chr5 | protein_coding | 1.4E+08 | 1.4E+08 | + | IGIP          | ENST00000333305 |
| Chr5 | protein_coding | 1.6E+08 | 1.6E+08 | + | GABRA1        | ENST00000393943 |
| Chr5 | protein_coding | 1.7E+08 | 1.7E+08 | - | BOD1          | ENST00000477985 |
| Chr5 | protein_coding | 1.8E+08 | 1.8E+08 | - | DOK3          | ENST00000357198 |
| Chr5 | protein_coding | 1.8E+08 | 1.8E+08 | - | CBY3          | ENST00000376974 |
| Chr5 | protein_coding | 1.8E+08 | 1.8E+08 | - | C5orf45       | ENST00000403396 |
| Chr6 | protein_coding | 2.7E+07 | 2.7E+07 | + | ZNF391        | ENST00000461521 |
| Chr6 | protein_coding | 3.2E+07 | 3.2E+07 | + | LST1          | ENST00000396101 |
| Chr6 | protein_coding | 3.3E+07 | 3.3E+07 | - | HLA-DQB2      | ENST00000437316 |
| Chr6 | protein_coding | 7.7E+07 | 7.7E+07 | - | IMPG1         | ENST00000369952 |
| Chr6 | lincRNA        | 9.5E+07 | 9.5E+07 | + | RP3-463P15.1  | ENST00000424506 |
| Chr6 | lincRNA        | 1.1E+08 | 1.1E+08 | - | RP1-60O19.1   | ENST00000602621 |
| Chr7 | protein_coding | 7273889 | 7288282 | + | C1GALT1       | ENST00000223122 |
| Chr7 | lincRNA        | 1.5E+07 | 1.5E+07 | + | AC006458.3    | ENST00000445093 |
| Chr7 | protein_coding | 5E+07   | 5E+07   | + | IKZF1         | ENST00000426121 |
| Chr7 | protein_coding | 7.5E+07 | 7.5E+07 | - | CCL24         | ENST00000222902 |
| Chr7 | protein_coding | 8E+07   | 8E+07   | + | CD36          | ENST00000435819 |
| Chr7 | protein_coding | 9.4E+07 | 9.4E+07 | - | BET1          | ENST00000222547 |
| Chr7 | miRNA          | 9.8E+07 | 9.8E+07 | - | MIR5692C2     | ENST00000577959 |
| Chr7 | protein_coding | 1E+08   | 1E+08   | + | PILRB         | ENST00000455145 |
| Chr7 | protein_coding | 1.1E+08 | 1.1E+08 | + | CDHR3         | ENST00000542731 |
| Chr7 | lincRNA        | 1.1E+08 | 1.1E+08 | + | AC068610.3    | ENST00000460471 |
| Chr7 | lincRNA        | 1.4E+08 | 1.4E+08 | - | RP5-842K16.1  | ENST00000461145 |
| Chr7 | protein_coding | 1.4E+08 | 1.4E+08 | - | TAS2R38       | ENST00000547270 |
| Chr7 | protein_coding | 1.6E+08 | 1.6E+08 | - | BLACE         | ENST00000378120 |
| ChrX | protein_coding | 2.4E+07 | 2.4E+07 | - | ACOT9         | ENST00000379295 |
| ChrX | protein_coding | 1.5E+08 | 1.5E+08 | - | CD99L2        | ENST00000418547 |

|       |                |         |         |   |               |                 |
|-------|----------------|---------|---------|---|---------------|-----------------|
| ChrX  | protein_coding | 1.5E+08 | 1.5E+08 | - | G6PD          | ENST00000369620 |
| Chr8  | protein_coding | 2.2E+07 | 2.2E+07 | + | CCAR2         | ENST00000520738 |
| Chr8  | protein_coding | 5.4E+07 | 5.4E+07 | - | RB1CC1        | ENST00000025008 |
| Chr8  | protein_coding | 5.5E+07 | 5.5E+07 | - | TCEA1         | ENST00000521604 |
| Chr8  | lincRNA        | 7.4E+07 | 7.4E+07 | - | RP11-434I12.4 | ENST00000522560 |
| Chr8  | protein_coding | 8.6E+07 | 8.6E+07 | - | CA1           | ENST00000432364 |
| Chr8  | protein_coding | 9.6E+07 | 9.6E+07 | - | C8orf37       | ENST00000286688 |
| Chr8  | protein_coding | 1.5E+08 | 1.5E+08 | + | MAF1          | ENST00000534811 |
| Chr9  | lincRNA        | 1.1E+08 | 1.1E+08 | - | RP11-339N8.1  | ENST00000415465 |
| Chr9  | protein_coding | 1.2E+08 | 1.2E+08 | - | AKNA          | ENST00000374075 |
| Chr9  | protein_coding | 1.3E+08 | 1.3E+08 | + | FPGS          | ENST00000373245 |
| Chr9  | protein_coding | 1.4E+08 | 1.4E+08 | + | C9orf169      | ENST00000409414 |
| Chr10 | miRNA          | 2E+07   | 2E+07   | - | AL353147.1    | ENST00000390783 |
| Chr10 | lincRNA        | 6.1E+07 | 6.1E+07 | - | LINC00948     | ENST00000600486 |
| Chr10 | lincRNA        | 1.1E+08 | 1.1E+08 | - | RP11-215N21.1 | ENST00000598903 |
| Chr10 | miRNA          | 1.3E+08 | 1.3E+08 | + | AL360176.1    | ENST00000401153 |
| Chr10 | miRNA          | 1.3E+08 | 1.3E+08 | - | AL583860.1    | ENST00000408790 |
| Chr10 | protein_coding | 1.4E+08 | 1.4E+08 | + | CYP2E1        | ENST00000252945 |
| Chr11 | protein_coding | 835194  | 837513  | + | CD151         | ENST00000530320 |
| Chr11 | protein_coding | 5289584 | 5291388 | - | HBE1          | ENST00000292896 |
| Chr11 | protein_coding | 1.1E+07 | 1.1E+07 | - | MRVI1         | ENST00000545852 |
| Chr11 | protein_coding | 3.3E+07 | 3.3E+07 | - | CCDC73        | ENST00000528333 |
| Chr11 | protein_coding | 3.4E+07 | 3.4E+07 | - | CD59          | ENST00000415002 |
| Chr11 | lincRNA        | 4.6E+07 | 4.6E+07 | + | CTD-2210P24.1 | ENST00000529769 |
| Chr11 | protein_coding | 6E+07   | 6E+07   | + | STX3          | ENST00000529177 |
| Chr11 | protein_coding | 6E+07   | 6E+07   | + | MS4A3         | ENST00000534744 |
| Chr11 | protein_coding | 6.2E+07 | 6.2E+07 | + | AP003733.1    | ENST00000601917 |
| Chr11 | protein_coding | 7.3E+07 | 7.3E+07 | - | RAB6A         | ENST00000310653 |
| Chr11 | protein_coding | 7.9E+07 | 7.9E+07 | - | TENM4         | ENST00000533074 |
| Chr11 | miRNA          | 9.4E+07 | 9.4E+07 | - | MIR548L       | ENST00000408303 |
| Chr11 | protein_coding | 1.1E+08 | 1.1E+08 | + | AP002884.2    | ENST00000595053 |
| Chr12 | protein_coding | 1.9E+07 | 2E+07   | + | PLEKHA5       | ENST00000536974 |
| Chr12 | protein_coding | 5.8E+07 | 5.8E+07 | - | DCTN2         | ENST00000546758 |
| Chr12 | protein_coding | 7.1E+07 | 7.1E+07 | + | CNOT2         | ENST00000548159 |
| Chr12 | protein_coding | 1.2E+08 | 1.2E+08 | + | KNTC1         | ENST00000534995 |
| Chr13 | protein_coding | 2.5E+07 | 2.5E+07 | + | SPATA13       | ENST00000424834 |
| Chr13 | lincRNA        | 6.4E+07 | 6.4E+07 | + | RP11-473M10.1 | ENST00000418943 |
| Chr13 | protein_coding | 7.8E+07 | 7.8E+07 | + | IRG1          | ENST00000449753 |
| Chr13 | lincRNA        | 1E+08   | 1E+08   | + | RP11-123H22.1 | ENST00000444795 |
| Chr14 | protein_coding | 3.2E+07 | 3.2E+07 | - | HECTD1        | ENST00000553700 |
| Chr14 | protein_coding | 3.2E+07 | 3.2E+07 | - | HEATR5A       | ENST00000538864 |
| Chr14 | lincRNA        | 3.6E+07 | 3.6E+07 | - | RP11-561B11.6 | ENST00000556448 |

|       |                  |         |         |   |               |                 |
|-------|------------------|---------|---------|---|---------------|-----------------|
| Chr14 | lincRNA          | 9.9E+07 | 9.9E+07 | + | RP11-1082A3.1 | ENST00000554515 |
| Chr15 | protein_coding   | 3.9E+07 | 3.9E+07 | + | SPRED1        | ENST00000561317 |
| Chr15 | protein_coding   | 4.3E+07 | 4.3E+07 | + | GANC          | ENST00000562859 |
| Chr15 | protein_coding   | 5.4E+07 | 5.4E+07 | - | WDR72         | ENST00000559418 |
| Chr15 | protein_coding   | 6.7E+07 | 6.7E+07 | + | DIS3L         | ENST00000319194 |
| Chr15 | lincRNA          | 9.8E+07 | 9.8E+07 | + | CTD-2147F2.1  | ENST00000560314 |
| Chr16 | protein_coding   | 3701838 | 3708096 | + | DNASE1        | ENST00000246949 |
| Chr16 | ense_overlapping | 3700637 | 3701704 | - | RP11-461A8.4  | ENST00000570409 |
| Chr16 | protein_coding   | 4404545 | 4465898 | - | CORO7         | ENST00000539968 |
| Chr16 | lincRNA          | 1.8E+07 | 1.8E+07 | - | CTA-481E9.4   | ENST00000569048 |
| Chr16 | protein_coding   | 2.1E+07 | 2.1E+07 | + | ACSM3         | ENST00000440284 |
| Chr16 | protein_coding   | 3.1E+07 | 3.1E+07 | - | BCL7C         | ENST00000215115 |
| Chr16 | protein_coding   | 3.1E+07 | 3.1E+07 | + | ITGAM         | ENST00000544665 |
| Chr16 | protein_coding   | 6.9E+07 | 6.9E+07 | + | HAS3          | ENST00000219322 |
| Chr16 | lincRNA          | 8.6E+07 | 8.6E+07 | - | RP11-805I24.4 | ENST00000600234 |
| Chr17 | protein_coding   | 1.7E+07 | 1.7E+07 | - | PEMT          | ENST00000395781 |
| Chr17 | protein_coding   | 3.9E+07 | 3.9E+07 | - | KRTAP1-4      | ENST00000377747 |
| Chr17 | protein_coding   | 4.3E+07 | 4.3E+07 | - | GFAP          | ENST00000587997 |
| Chr17 | protein_coding   | 6.3E+07 | 6.3E+07 | + | CEP95         | ENST00000553412 |
| Chr17 | protein_coding   | 6.3E+07 | 6.3E+07 | - | LRRRC37A3     | ENST00000334962 |
| Chr18 | protein_coding   | 3455412 | 3458409 | + | TGIF1         | ENST00000472042 |
| Chr18 | protein_coding   | 4.6E+07 | 4.6E+07 | + | CTIF          | ENST00000587752 |
| Chr18 | protein_coding   | 5.5E+07 | 5.5E+07 | + | ST8SIA3       | ENST00000586360 |
| Chr18 | protein_coding   | 6.7E+07 | 6.8E+07 | + | DOK6          | ENST00000382713 |
| Chr20 | protein_coding   | 327426  | 334137  | + | NRSN2         | ENST00000609179 |
| Chr20 | protein_coding   | 1.8E+07 | 1.8E+07 | - | RRBP1         | ENST00000246043 |
| Chr20 | protein_coding   | 3.6E+07 | 3.6E+07 | - | RBL1          | ENST00000373664 |
| Chr19 | protein_coding   | 7793843 | 7797057 | - | CLEC4G        | ENST00000328853 |
| Chr19 | protein_coding   | 1.2E+07 | 1.2E+07 | - | ZNF44         | ENST00000356109 |
| Chr19 | protein_coding   | 1.8E+07 | 1.8E+07 | + | FCHO1         | ENST00000596951 |
| Chr19 | lincRNA          | 3.4E+07 | 3.4E+07 | - | CTD-2540B15.1 | ENST00000604605 |
| Chr19 | protein_coding   | 3.5E+07 | 3.5E+07 | + | GPI           | ENST00000586425 |
| Chr19 | protein_coding   | 3.6E+07 | 3.6E+07 | + | CD22          | ENST00000341773 |
| Chr19 | protein_coding   | 3.6E+07 | 3.6E+07 | - | HSPB6         | ENST00000592984 |
| Chr19 | protein_coding   | 4.2E+07 | 4.2E+07 | - | ATP5SL        | ENST00000586786 |
| Chr19 | protein_coding   | 4.8E+07 | 4.9E+07 | + | ELSPBP1       | ENST00000339841 |
| Chr19 | protein_coding   | 4.9E+07 | 4.9E+07 | + | EMP3          | ENST00000597279 |
| Chr19 | miRNA            | 5.4E+07 | 5.4E+07 | + | MIR373        | ENST00000362273 |
| Chr19 | lincRNA          | 5.4E+07 | 5.4E+07 | + | AC008753.4    | ENST00000597420 |
| Chr19 | protein_coding   | 5.4E+07 | 5.4E+07 | + | MYADM         | ENST00000336967 |
| Chr19 | sense_intronic   | 5.6E+07 | 5.6E+07 | + | CTD-2611O12.1 | ENST00000597680 |
| Chr21 | protein_coding   | 2.3E+07 | 2.3E+07 | + | NCAM2         | ENST00000535285 |

|       |                |         |         |   |            |                 |
|-------|----------------|---------|---------|---|------------|-----------------|
| Chr21 | lincRNA        | 2.6E+07 | 2.6E+07 | + | AP000476.1 | ENST00000415182 |
| Chr21 | protein_coding | 3.2E+07 | 3.2E+07 | + | KRTAP20-2  | ENST00000330798 |
| Chr21 | protein_coding | 4.3E+07 | 4.3E+07 | + | MX2        | ENST00000418103 |
| Chr21 | protein_coding | 4.6E+07 | 4.6E+07 | - | UBE2G2     | ENST00000330942 |
| Chr21 | protein_coding | 4.7E+07 | 4.7E+07 | - | PRED57     | ENST00000600921 |

---

**Table S3C. List of fragmentation biomarkers used in model construction.**

| <b>seqnames</b> | <b>start</b> | <b>end</b> | <b>width</b> | <b>annotation</b> | <b>geneChr</b> | <b>geneStart</b> |
|-----------------|--------------|------------|--------------|-------------------|----------------|------------------|
| chr8            | 43000002     | 44000001   | 1000000      | Promoter (<=1kb)  | 8              | 43147585         |
| chr4            | 191000002    | 192000001  | 1000000      | Promoter (<=1kb)  | 4              | 191012063        |
| chr4            | 134000002    | 135000001  | 1000000      | Promoter (<=1kb)  | 4              | 134070470        |
| chr9            | 141000002    | 142000001  | 1000000      | Promoter (<=1kb)  | 9              | 141106637        |
| chr1            | 121000002    | 122000001  | 1000000      | Promoter (<=1kb)  | 1              | 121107152        |
| chr11           | 69000002     | 70000001   | 1000000      | Promoter (<=1kb)  | 11             | 69471368         |
| chr10           | 39000002     | 40000001   | 1000000      | Distal Intergenic | 10             | 38989727         |
| chr14           | 18000002     | 19000001   | 1000000      | Distal Intergenic | 14             | 19377594         |
| chr15           | 19000002     | 20000001   | 1000000      | Distal Intergenic | 15             | 20487997         |
| chr2            | 89000002     | 90000001   | 1000000      | Promoter (<=1kb)  | 2              | 89111884         |

| <b>geneEnd</b> | <b>geneLength</b> | <b>geneStrand</b> | <b>distanceToTSS</b> | <b>SYMBOL</b> |
|----------------|-------------------|-------------------|----------------------|---------------|
| 43218328       | 70744             | 1                 | 0                    | POTEA         |
| 191013442      | 1380              | 1                 | 0                    | DUX4L8        |
| 134074404      | 3935              | 1                 | 0                    | PCDH10        |
| 141134172      | 27536             | 1                 | 0                    | FAM157B       |
| 121129827      | 22676             | 1                 | 0                    | SRGAP2D       |
| 69490165       | 18798             | 2                 | 0                    | LTO1          |
| 38991371       | 1645              | 1                 | 10275                | ACTR3BP5      |
| 19378574       | 981               | 1                 | -377593              | OR11H12       |
| 20496811       | 8815              | 1                 | -487996              | CHEK2P2       |
| 89111968       | 85                | 1                 | 0                    | MIR4436A      |

---

**GENENAME**

---

POTE ankyrin domain family member A

double homeobox 4 like 8 (pseudogene)

protocadherin 10

family with sequence similarity 157 member B

SLIT-ROBO Rho GTPase activating protein 2D (pseudogene)

LTO1 maturation factor of ABCE1

ACTR3B pseudogene 5

olfactory receptor family 11 subfamily H member 12

checkpoint kinase 2 pseudogene 2

microRNA 4436a

---



1 **Supplementary Figure Legends**

2

3 **Figure S1. Comparison of subjects' age distributions (A) and gender distributions**  
4 **(B) among HC, Early and Mid-Ad ESCC groups.** HC, healthy controls; ESCC,  
5 esophageal squamous cell carcinoma; Mid-Ad, middle to advanced.

6

7 **Figure S2. Study design and research pipeline for early detection of ESCC.**

8 5hmC and low-pass WGS-based diagnostic model were respectively developed for  
9 identifying ctDNA from plasma cfDNA using machine learning approach. 171 subjects  
10 were analyzed to derive genome-wide 5hmC profiles and further trained and evaluated  
11 5hmC-based diagnostic performance. Due to inadequate cfDNA limitation, only 164  
12 subjects were available to perform low-pass WGS and construct integrated diagnostic  
13 model. ctDNA, circulating tumor DNA. cfDNA, cell-free DNA; HC, healthy controls  
14 individuals; ESCC, esophageal squamous cell carcinoma; Mid-Ad, middle-advanced;  
15 5hmC, 5-hydroxymethylcytosines; WGS, whole genome sequencing; NF, nucleosome  
16 footprint; RFECV, recursive feature elimination - cross validation; Lasso, least absolute  
17 shrinkage and selection operator; SVM, support vector machine.

18

19 **Figure S3. Comparison of the total number of 5hmC peaks between ESCC (green,**  
20 **n=100) and HC (blue, n=71) cohorts.** Each dot depicts an individual cfDNA sample.

21 *P* value shows statistical significance by Mann-Whitney U test. HC, healthy controls;  
22 ESCC, esophageal squamous cell carcinoma.

23

24 **Figure S4. Comparison of predictive scores of 5hmC classifier among HC, Early**  
25 **ESCC and Mid-Ad ESCC groups in the internal test set.** HC, healthy controls;  
26 ESCC, esophageal squamous cell carcinoma; Mid-Ad, middle to advanced.

27

28 **Figure S5. The diagnostic powers of individual genomic features and 5hmC**  
29 **classifier and combined classifier in the test set.** (A) The table of diagnostic  
30 sensitivity and specificity of individual genomic features in ESCC vs HC of the test set.  
31 (B) The table of the diagnostic accuracy of 5hmC classifier and combined classifier in  
32 different clinical stages of ESCC. Sen, sensitivity; Spe, specificity; HC, healthy  
33 controls; ESCC, esophageal squamous cell carcinoma; NF, nucleosome footprint.

34

### 35 **Supplementary Table legends**

36 **Table S1.** Demographic and clinicopathological characteristics of esophageal cancer  
37 patients and healthy controls.

38 **Table S2.** List of annotated 5hmC marker genes used in model construction.

39 **Table S3.** List of 5' end motif (A), NF (B) and fragmentation (C) biomarkers used in  
40 model construction. NF, nucleosome footprint.  
41

**Figure S1**  
**B**

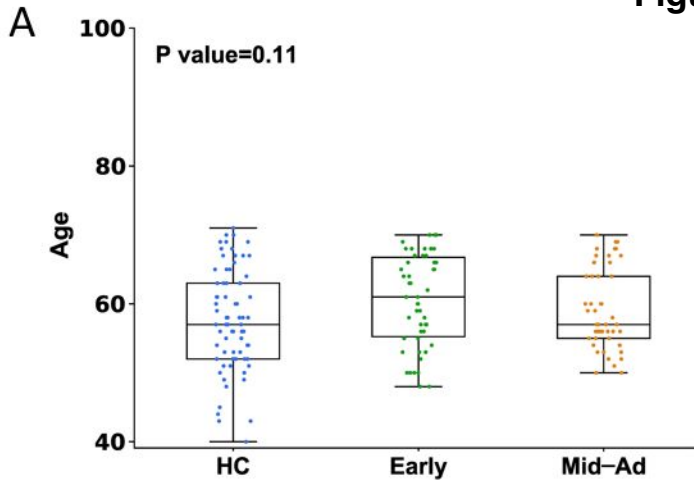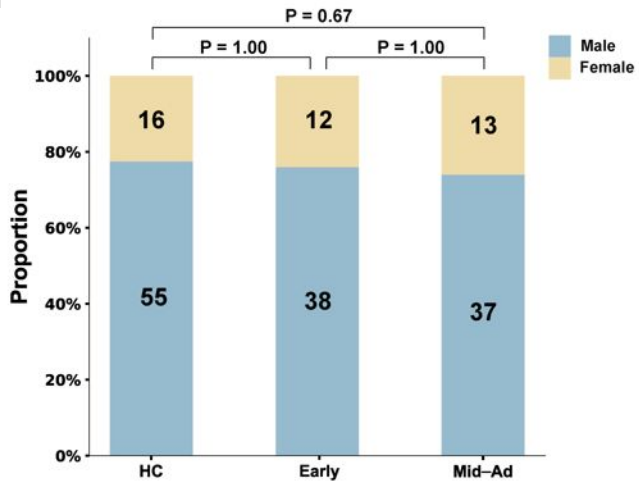

**Figure S2**

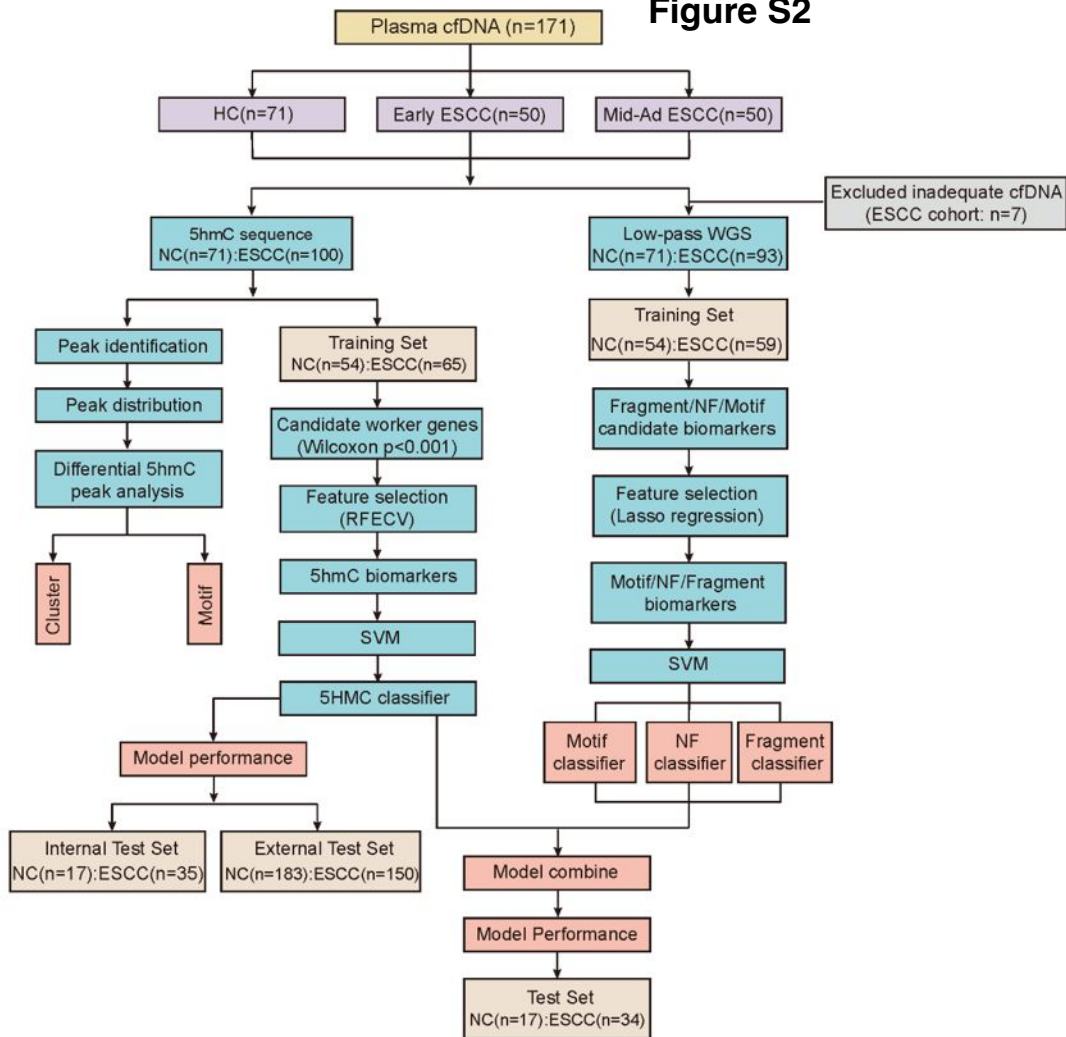

Figure S3

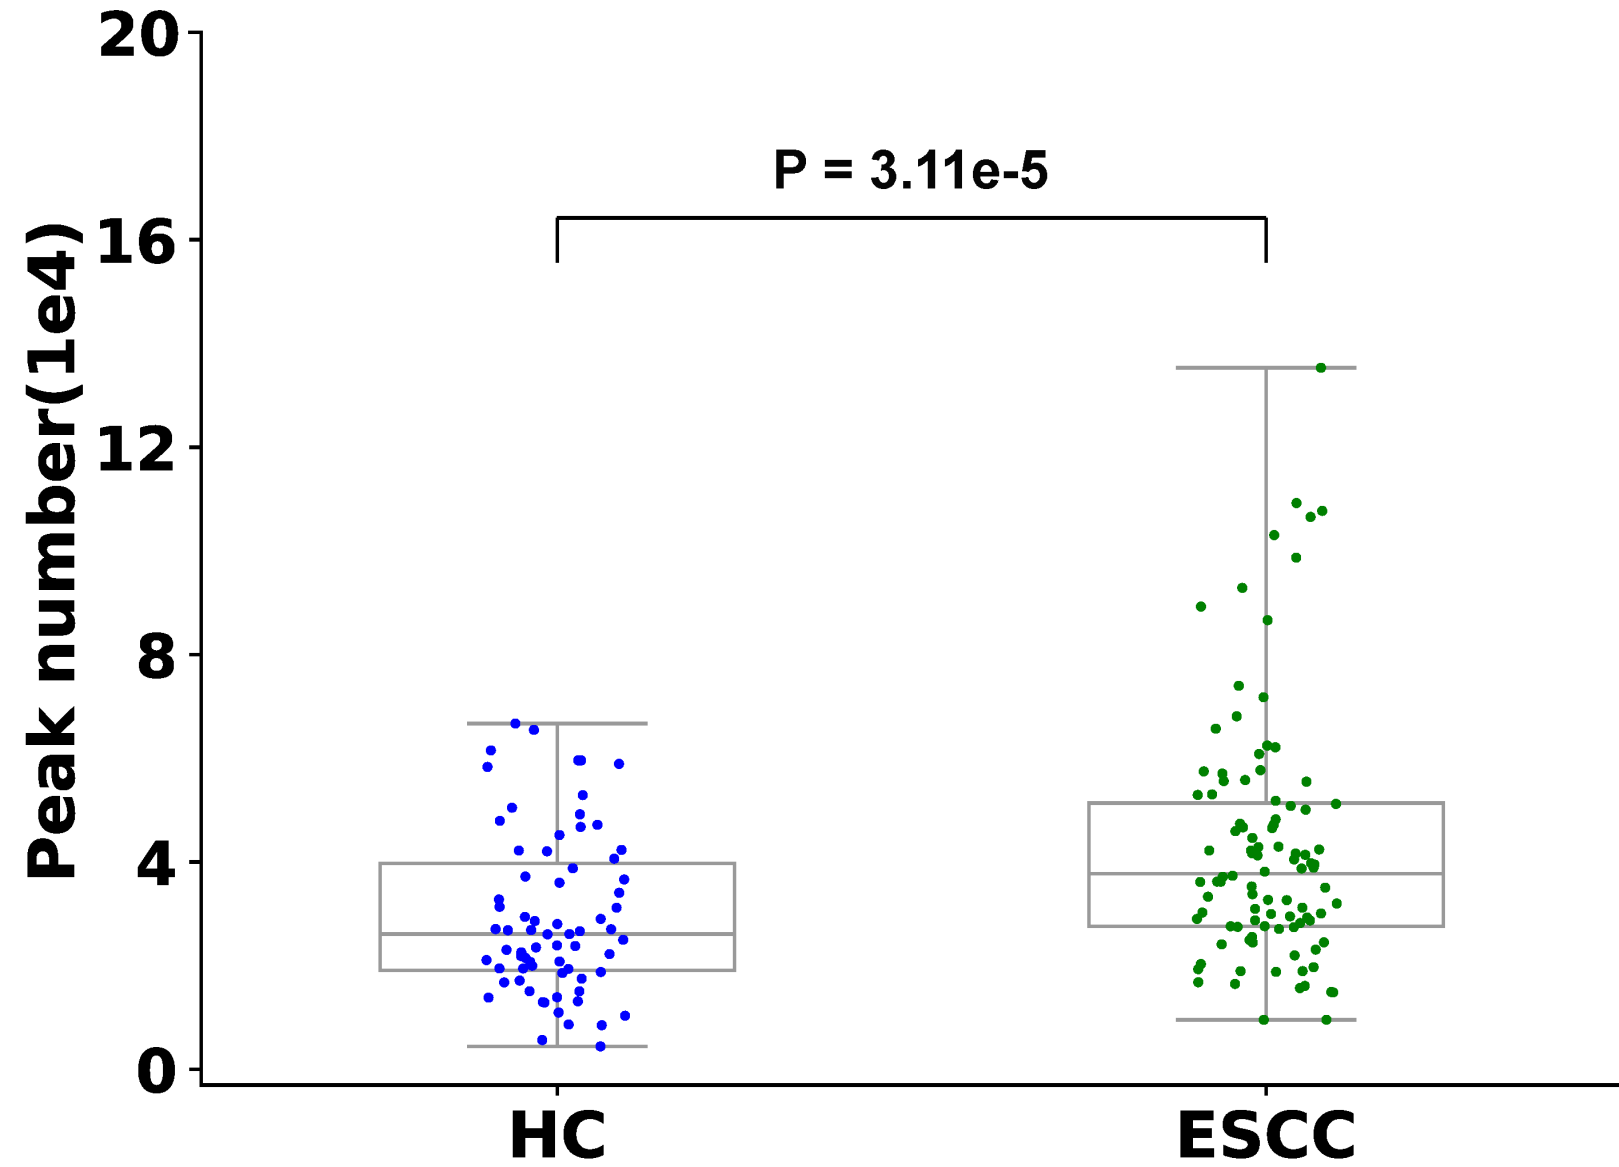

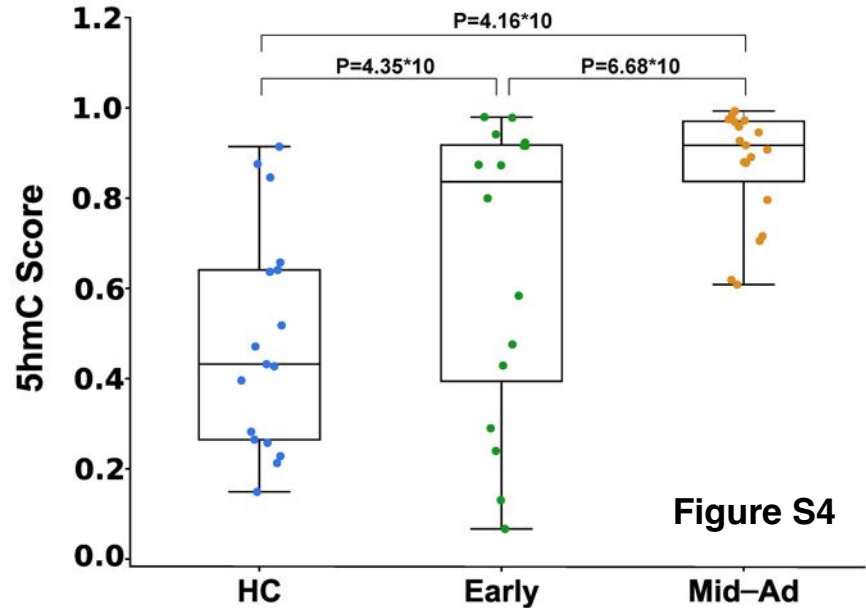

**Figure S5**

**A**

| <b>Motif-test</b> |             |           |
|-------------------|-------------|-----------|
| Classes           | Actual_ESCC | Actual_HC |
| Predicted_ESCC    | 25          | 3         |
| Predicted_HC      | 9           | 14        |
| <b>Se/Sp</b>      | 73.5%       | 82.4%     |

| <b>NF-test</b> |             |           |
|----------------|-------------|-----------|
| Classes        | Actual_ESCC | Actual_HC |
| Predicted_ESCC | 31          | 5         |
| Predicted_HC   | 3           | 12        |
| <b>Se/Sp</b>   | 91.2%       | 70.6%     |

| <b>Fragment-test</b> |             |           |
|----------------------|-------------|-----------|
| Classes              | Actual_ESCC | Actual_HC |
| Predicted_ESCC       | 27          | 3         |
| Predicted_HC         | 7           | 14        |
| <b>Se/Sp</b>         | 79.4%       | 82.4%     |

| <b>5hmC-test</b> |             |           |
|------------------|-------------|-----------|
| Classes          | Actual_ESCC | Actual_HC |
| Predicted_ESCC   | 26          | 3         |
| Predicted_HC     | 8           | 14        |
| <b>Se/Sp</b>     | 76.5%       | 82.4%     |

**B**

| Stage               | 5hmC classifier accuracy | Stage               | Combined classifier accuracy |
|---------------------|--------------------------|---------------------|------------------------------|
| P0 (n=6)            | 33.3% (2/6)              | P0 (n=5)            | 80.0% (4/5)                  |
| I (n=10)            | 70.0% (7/10)             | I (n=10)            | 80.0% (8/10)                 |
| II (n=9)            | 88.9% (8/9)              | II (n=9)            | 88.9% (8/9)                  |
| III (n=8)           | 87.5% (7/8)              | III (n=8)           | 75.0% (6/8)                  |
| IV (n=2)            | 100% (2/2)               | IV (n=2)            | 100% (2/2)                   |
| <b>Total (n=35)</b> | <b>74.3% (26/35)</b>     | <b>Total (n=34)</b> | <b>82.4% (28/34)</b>         |
